# Supplementary material for: Two-dimensional tetragonal AlOX (X = Cl, Br, or I) monolayers with promising photocatalytic performance: first-principles investigations
Source: Royal Society of Chemistry journal article supplement (doi:10.1039/d4cp00233d), 2024-01-01
Supplement: d4cp00233d1.pdf [file d4cp00233d1.pdf]

## Supporting Information (SI)

### Two-dimensional tetragonal AIOX (X=Cl, Br, or I) monolayers for promising photocatalytic performance: first-principles investigations

Yijing Ren,<sup>a</sup> Xinguo Ma,<sup>\*ab</sup> Gang Yuan,<sup>a</sup> Jiajun Liao,<sup>a</sup> Nan M<sup>c</sup>, Di Li<sup>d</sup> and Hui Lv<sup>a</sup>

<sup>a</sup>*school of science, Hubei University of Technology, Wuhan 430068, China.*

<sup>b</sup>*State Key Laboratory of Advanced Technology for Float Glass, Bengbu Glass Industrial Design and Research Institute, Bengbu, 233030, China.*

<sup>c</sup>*Key Laboratory of Inorganic Functional Materials and Devices, Chinese Academy of Sciences, Shanghai 201899, China.*

<sup>d</sup>*School of Metallurgical Engineering, Xi'an University of Architecture and, Xi'an, Technology 710055, China.*

**\*Corresponding Authors, E-mail:** [maxg@hbut.edu.cn](mailto:maxg@hbut.edu.cn); [manan@mail.sic.ac.cn](mailto:manan@mail.sic.ac.cn).

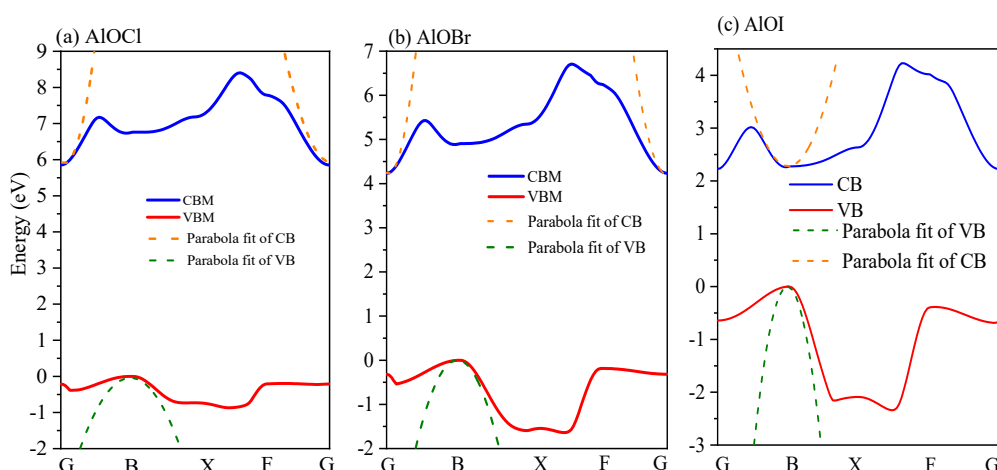

**Fig. S1** The curves of VBM and CBM (solid line) for three crystal structures of AIOX (X=Cl, Br, or I) monolayers, and quadratic fitting curves (dash lines) at the VBM and CBM.

**Table S1** Optimized lattice constants (a and b), bond lengths ( $d_{\text{Al-O}}$ ,  $d_{\text{Al-X}}$ ), and bond angles of the AlOX (X=Cl, Br, or I) monolayers after geometry optimization using PBE method with SOC effect

| material | a (nm) | b (nm) | $d_{\text{Al-O}}$ (nm) | $d_{\text{Al-X}}$ (nm) | $\theta_{\text{X-Al-O}}$ | $\theta_{\text{Al-O-Al}}$ | $\theta_{\text{O-Al-O}}$ |
|----------|--------|--------|------------------------|------------------------|--------------------------|---------------------------|--------------------------|
| AlOCl    | 0.30   | 0.46   | 0.18, 0.19             | 0.23                   | 90.94                    | 88.27                     | 90.81                    |
| AlOBr    | 0.30   | 0.37   | 0.19, 0.20             | 0.25                   | 90.61                    | 90.03                     | 89.91                    |
| AlOI     | 0.33   | 0.46   | 0.18, 0.19             | 0.27                   | 89.99                    | 90.00                     | 90.00                    |

**Table S2** Mulliken charges and overlap populations of AlOX (X=Cl, Br, or I) monolayers after geometry optimization using PBE and CAPZ methods

| method | materials | species         | charge | bonds                            | population |
|--------|-----------|-----------------|--------|----------------------------------|------------|
| PBE    | AlOCl     | Al <sub>1</sub> | 1.66   | O <sub>1</sub> -Al <sub>1</sub>  | 0.44       |
|        |           | Al <sub>2</sub> | 1.66   | O <sub>2</sub> -Al <sub>2</sub>  | 0.44       |
|        |           | O <sub>1</sub>  | -1.25  | O <sub>2</sub> -Al <sub>1</sub>  | 0.60       |
|        |           | O <sub>2</sub>  | -1.25  | O <sub>1</sub> -Al <sub>2</sub>  | 0.60       |
|        |           | Cl <sub>1</sub> | -0.41  | Al <sub>2</sub> -Cl <sub>1</sub> | 0.75       |
|        |           | Cl <sub>2</sub> | -0.41  | Al <sub>1</sub> -Cl <sub>2</sub> | 0.75       |
|        | AlOBr     | Al <sub>1</sub> | 1.36   | O <sub>1</sub> -Al <sub>1</sub>  | 0.52       |
|        |           | Al <sub>2</sub> | 1.36   | O <sub>2</sub> -Al <sub>2</sub>  | 0.52       |
|        |           | O <sub>1</sub>  | -1.20  | O <sub>2</sub> -Al <sub>1</sub>  | 0.51       |
|        |           | O <sub>2</sub>  | -1.20  | O <sub>1</sub> -Al <sub>2</sub>  | 0.51       |
|        |           | Br <sub>1</sub> | -0.16  | Al <sub>2</sub> -Br <sub>1</sub> | 0.91       |
|        |           | Br <sub>2</sub> | -0.16  | Al <sub>1</sub> -Br <sub>2</sub> | 0.91       |
|        | AlOI      | Al <sub>1</sub> | 1.26   | O <sub>1</sub> -Al <sub>1</sub>  | 0.67       |
|        |           | Al <sub>2</sub> | 1.26   | O <sub>2</sub> -Al <sub>2</sub>  | 0.67       |
|        |           | O <sub>1</sub>  | -1.18  | O <sub>2</sub> -Al <sub>1</sub>  | 0.38       |
|        |           | O <sub>2</sub>  | -1.18  | O <sub>1</sub> -Al <sub>2</sub>  | 0.38       |
|        |           | I <sub>1</sub>  | -0.07  | Al <sub>2</sub> -I <sub>1</sub>  | 0.78       |
|        |           | I <sub>2</sub>  | -0.07  | Al <sub>1</sub> -I <sub>2</sub>  | 0.78       |
| CAPZ   | AlOCl     | Al <sub>1</sub> | 1.48   | O <sub>1</sub> -Al <sub>1</sub>  | 0.53       |
|        |           | Al <sub>2</sub> | 1.48   | O <sub>2</sub> -Al <sub>2</sub>  | 0.53       |
|        |           | O <sub>1</sub>  | -1.09  | O <sub>2</sub> -Al <sub>1</sub>  | 0.64       |
|        |           | O <sub>2</sub>  | -1.09  | O <sub>1</sub> -Al <sub>2</sub>  | 0.64       |
|        |           | Cl <sub>1</sub> | -0.39  | Al <sub>2</sub> -Cl <sub>1</sub> | 0.74       |
|        |           | Cl <sub>2</sub> | -0.39  | Al <sub>1</sub> -Cl <sub>2</sub> | 0.74       |
|        | AlOBr     | Al <sub>1</sub> | 1.34   | O <sub>1</sub> -Al <sub>1</sub>  | 0.56       |
|        |           | Al <sub>2</sub> | 1.34   | O <sub>2</sub> -Al <sub>2</sub>  | 0.56       |
|        |           | O <sub>1</sub>  | -1.08  | O <sub>2</sub> -Al <sub>1</sub>  | 0.59       |
|        |           | O <sub>2</sub>  | -1.08  | O <sub>1</sub> -Al <sub>2</sub>  | 0.59       |
|        |           | Br <sub>1</sub> | -0.26  | Al <sub>2</sub> -Br <sub>1</sub> | 0.75       |
|        |           | Br <sub>2</sub> | -0.26  | Al <sub>1</sub> -Br <sub>2</sub> | 0.75       |
|        | AlOI      | Al <sub>1</sub> | 1.22   | O <sub>1</sub> -Al <sub>1</sub>  | 0.59       |
|        |           | Al <sub>2</sub> | 1.22   | O <sub>2</sub> -Al <sub>2</sub>  | 0.59       |
|        |           | O <sub>1</sub>  | -1.06  | O <sub>2</sub> -Al <sub>1</sub>  | 0.54       |
|        |           | O <sub>2</sub>  | -1.06  | O <sub>1</sub> -Al <sub>2</sub>  | 0.54       |
|        |           | I <sub>1</sub>  | -0.16  | Al <sub>2</sub> -I <sub>1</sub>  | 0.78       |
|        |           | I <sub>2</sub>  | -0.16  | Al <sub>1</sub> -I <sub>2</sub>  | 0.78       |

**Table S3** Mulliken charges and overlap populations of AlOX (X=Cl, Br, or I) monolayers after geometry optimization using PBE method with SOC effect

| materials | species         | charge | bonds                            | population |
|-----------|-----------------|--------|----------------------------------|------------|
| AlOCl     | Al <sub>1</sub> | 1.15   | O <sub>1</sub> -Al <sub>1</sub>  | 0.60       |
|           | Al <sub>2</sub> | 1.15   | O <sub>2</sub> -Al <sub>2</sub>  | 0.60       |
|           | O <sub>1</sub>  | -0.51  | O <sub>2</sub> -Al <sub>1</sub>  | 0.60       |
|           | O <sub>2</sub>  | -0.51  | O <sub>1</sub> -Al <sub>2</sub>  | 0.60       |
|           | Cl <sub>1</sub> | -0.63  | Al <sub>2</sub> -Cl <sub>1</sub> | 0.10       |
|           | Cl <sub>2</sub> | -0.63  | Al <sub>1</sub> -Cl <sub>2</sub> | 0.09       |
| AlOBr     | Al <sub>1</sub> | 0.83   | O <sub>1</sub> -Al <sub>1</sub>  | -0.03      |
|           | Al <sub>2</sub> | 0.85   | O <sub>2</sub> -Al <sub>2</sub>  | -0.02      |
|           | O <sub>1</sub>  | -0.35  | O <sub>2</sub> -Al <sub>1</sub>  | 0.22       |
|           | O <sub>2</sub>  | -0.35  | O <sub>1</sub> -Al <sub>2</sub>  | 0.22       |
|           | Br <sub>1</sub> | -0.49  | Al <sub>2</sub> -Br <sub>1</sub> | -0.52      |
|           | Br <sub>2</sub> | -0.48  | Al <sub>1</sub> -Br <sub>2</sub> | -0.49      |
| AlOI      | Al <sub>1</sub> | 0.46   | O <sub>1</sub> -Al <sub>1</sub>  | -0.08      |
|           | Al <sub>2</sub> | 0.46   | O <sub>2</sub> -Al <sub>2</sub>  | -0.05      |
|           | O <sub>1</sub>  | -0.48  | O <sub>2</sub> -Al <sub>1</sub>  | -0.03      |
|           | O <sub>2</sub>  | -0.48  | O <sub>1</sub> -Al <sub>2</sub>  | -0.04      |
|           | I <sub>1</sub>  | 0.04   | Al <sub>2</sub> -I <sub>1</sub>  | 0.08       |
|           | I <sub>2</sub>  | 0.02   | Al <sub>1</sub> -I <sub>2</sub>  | 0.09       |

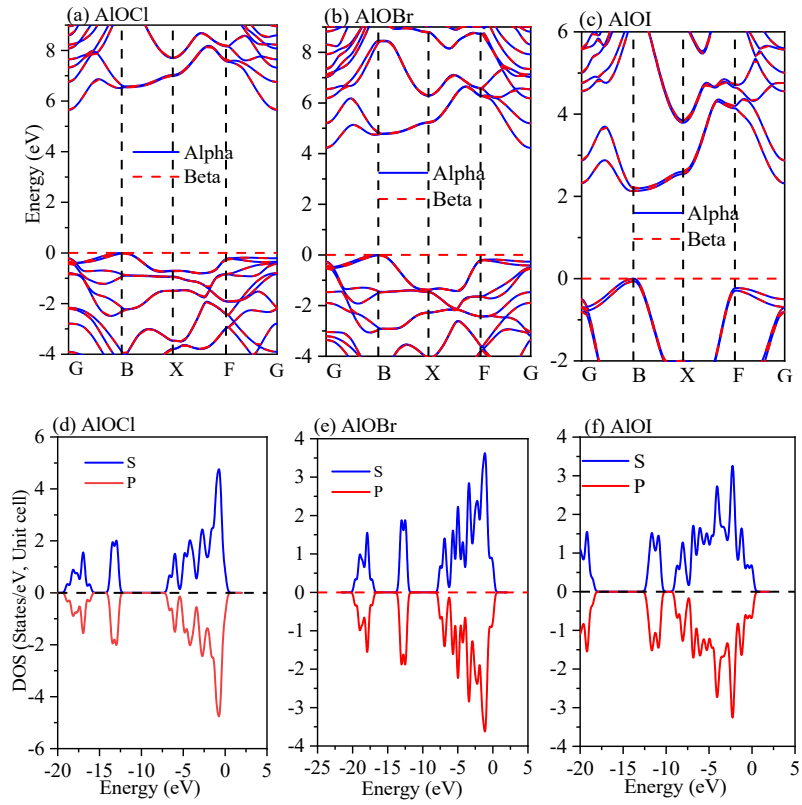

**Fig.S2** (a-c) Energy band structures and (d-f) DOS of AlOCl, AlOBr, and AlOI monolayers with SOC formalism.

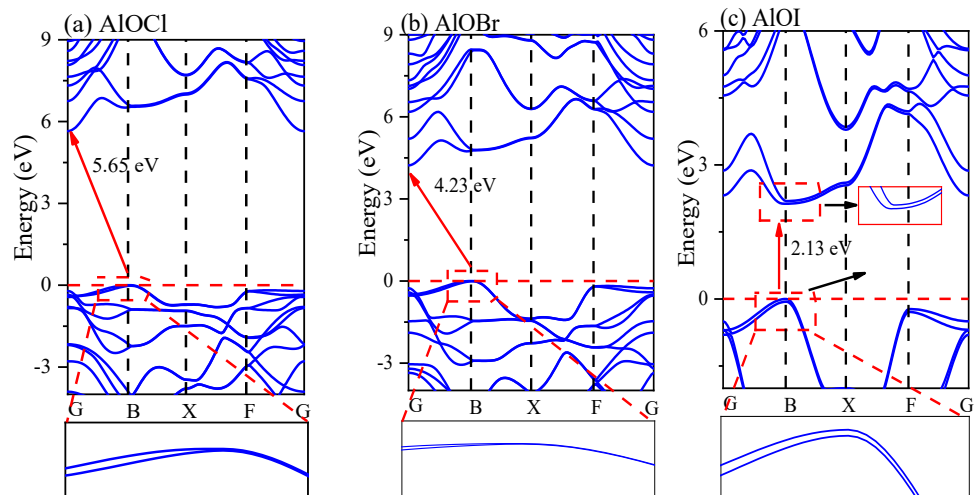

**Fig.S3** Energy band structures of (a) AlOCl, (b) AlOBr, and (c) AlOI monolayers with SOC formalism.

At the acid condition, the photocatalytic reaction of water-splitting is composed of the following two half-reactions.

For HER at pH = 0, it can be described as:

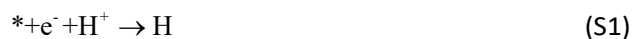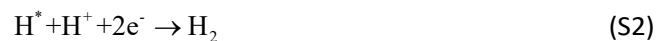

In terms of OER, it follows a four-electron transferred reaction pathway:

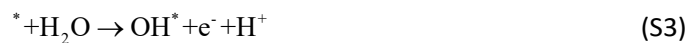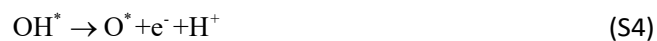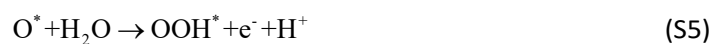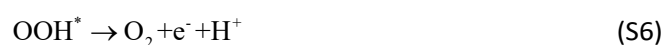

where \* is the active site on the photocatalysts, O\*, OH\*, OOH\* and H\* are adsorbed intermediates.

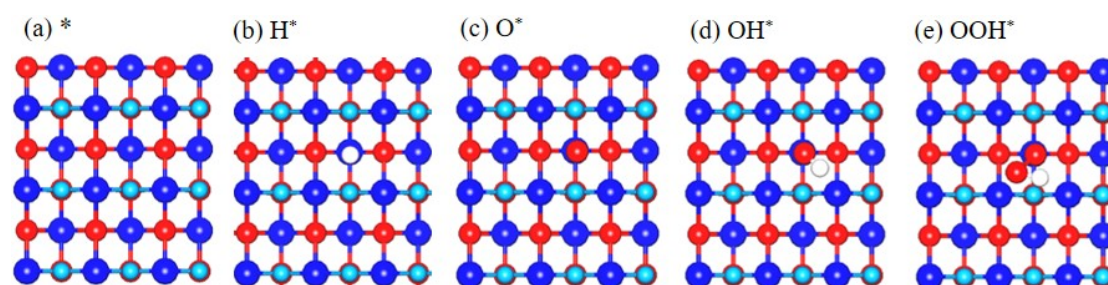

**Fig. S4** The most probable intermediates adsorbed on the Al of AlOCl monolayer, (a) \* , (b) H\* , (c) O\* and (d) OH\* and (e) OOH\*. Here, blue, red, yellow, and white balls represent the Al, O, Cl and H atoms, respectively.
